# Supplementary material
Source: PubMed Central journal article supplement (PMC5488334)
Supplement: NIHMS865870-supplement-Supplemental_Table.pdf [file NIHMS865870-supplement-Supplemental_Table.pdf]

**Supplemental Table 1.** Spearman correlation coefficients of phytoestrogen concentrations among mothers of girls with and without earlier age at menarche in the Avon Longitudinal Study of Parents and Children (ALSPAC) nested case-control study population (N=367 mother-daughter dyads).

|               | Genistein | Daidzein | Equol   | <i>O</i> -DMA | Enterodiol | Enterolactone |
|---------------|-----------|----------|---------|---------------|------------|---------------|
| Genistein     | --        |          |         |               |            |               |
| p-value       |           |          |         |               |            |               |
| Daidzein      | 0.89      | --       |         |               |            |               |
| p-value       | <0.0001   |          |         |               |            |               |
| Equol         | 0.46      | 0.44     | --      |               |            |               |
| p-value       | <0.0001   | <0.0001  |         |               |            |               |
| <i>O</i> -DMA | 0.47      | 0.66     | 0.38    | --            |            |               |
| p-value       | <0.0001   | <0.0001  | <0.0001 |               |            |               |
| Enterodiol    | 0.36      | 0.35     | 0.35    | 0.22          | --         |               |
| p-value       | <0.0001   | <0.0001  | <0.0001 | <0.0001       |            |               |
| Enterolactone | 0.24      | 0.32     | 0.36    | 0.41          | 0.44       | --            |
| p-value       | <0.0001   | <0.0001  | <0.0001 | <0.0001       | <0.0001    |               |

Abbreviations: *O*-DMA, *O*-Desmethylangolensin
